# Supplementary material for: Real-time and reversible light-actuated microfluidic channel squeezing in dye-doped PDMS
Source: Royal Society of Chemistry journal article supplement (doi:10.1039/d0sm00217h), 2020-01-01
Supplement: d0sm00217h3.pdf [file d0sm00217h3.pdf]

## Real-time and reversible light-actuated microfluidic channel squeezing in dye-doped PDMS

Angelo Angelini<sup>a</sup>, Ubirajara Agero<sup>c</sup>, Federico Ferrarese Lupi<sup>a</sup>, Matteo Fretto<sup>a</sup>, Fabrizio Pirri<sup>a,b</sup>, Francesca Frascella<sup>a\*</sup>

We imaged the cross section of the channel when exposed to different laser intensities (Fig. S1a-i). In fig. S1-j we measured the ratio between the clear area of the channel exposed to different laser intensities over the initial area of the channel.

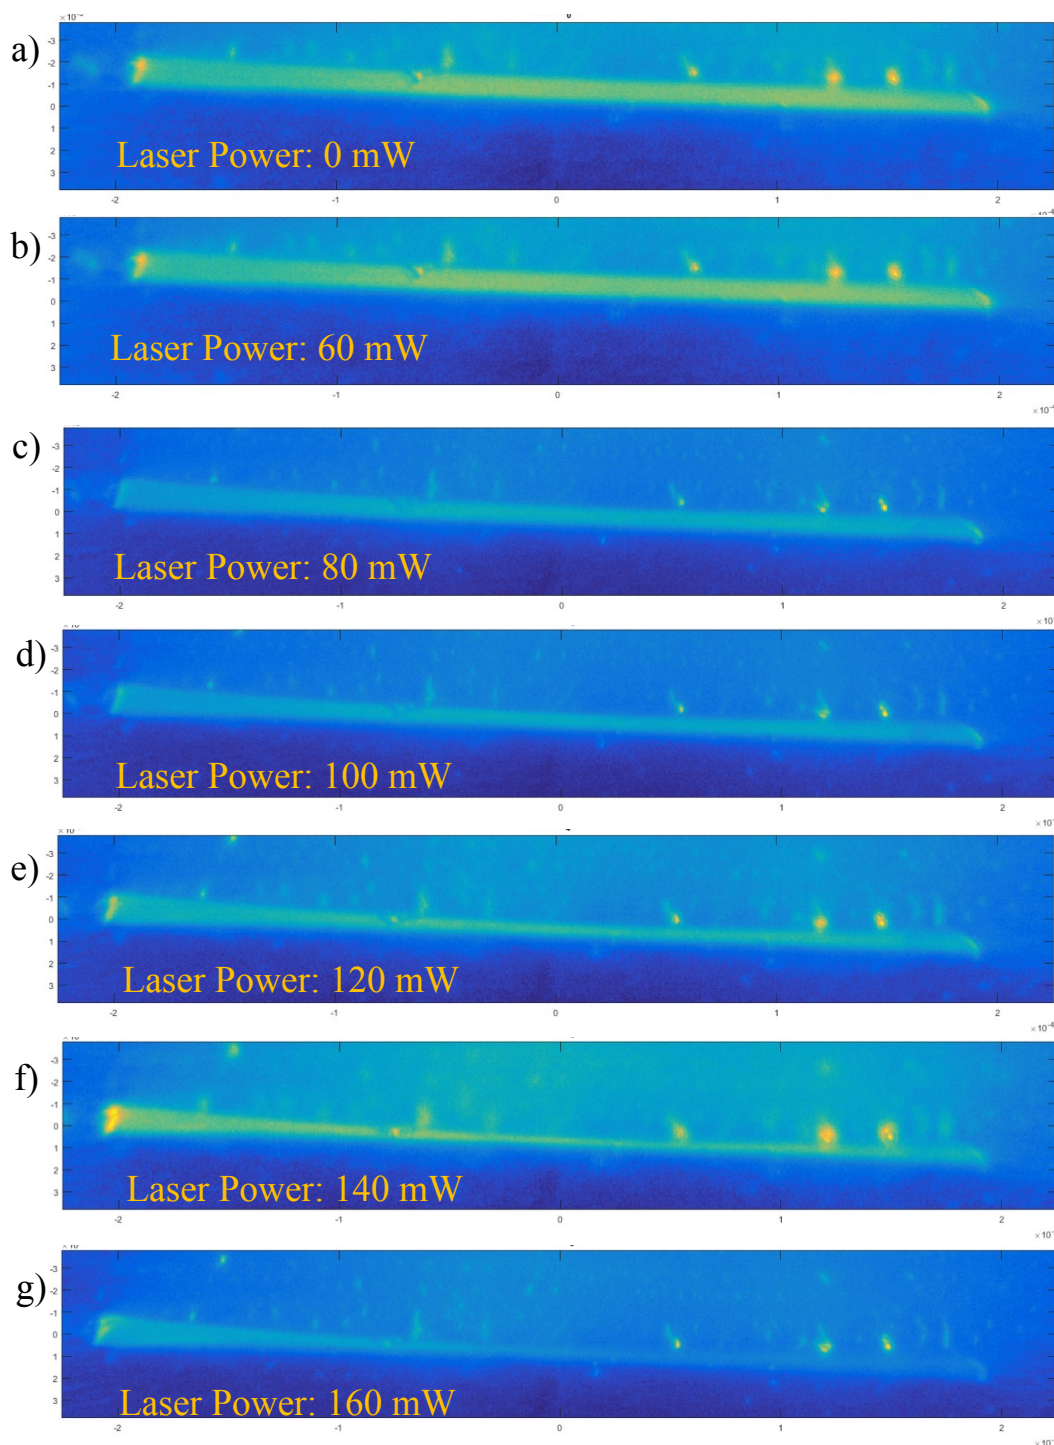

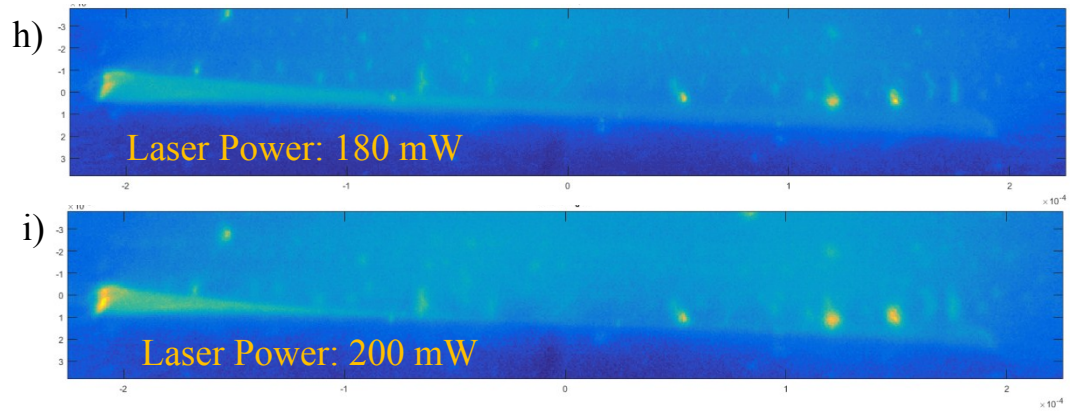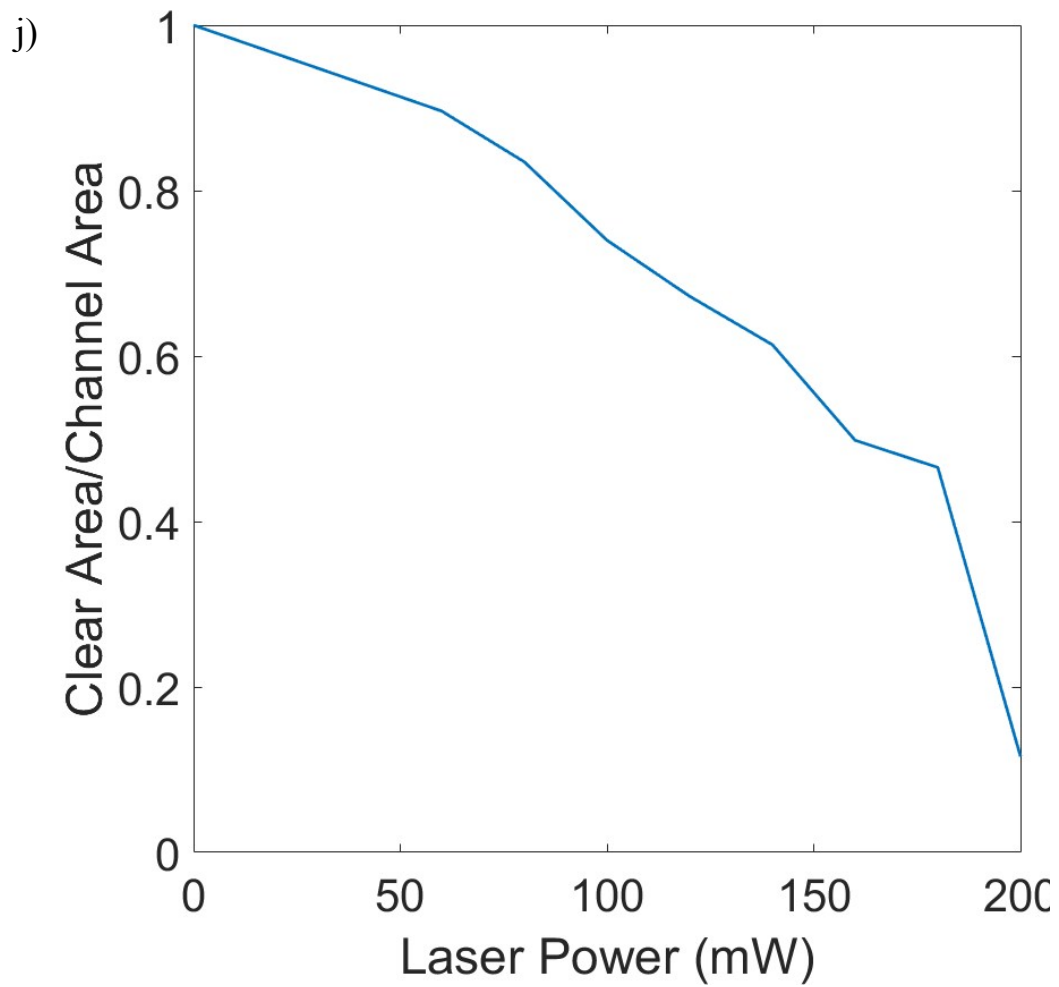

Figure S1 a-i) Cross-section of the microfluidic channel exposed to increasing laser power. j) Ratio between clear area over channel area versus Laser Power
